# Supplementary material
Source: PubMed Central journal article supplement (PMC6321778)

Table S1. Sensitivity Analysis: Percent Difference in Fibroid Size and Uterine Volume Associated with Specific Gravity-Adjusted Phthalate Biomarker Concentrations.

|                      | Percent change (95% CI) <sup>a</sup> |                        |                                   |                               |
|----------------------|--------------------------------------|------------------------|-----------------------------------|-------------------------------|
|                      | Fibroid Size (cm)                    |                        | Uterine Volume (cm <sup>3</sup> ) |                               |
|                      | $\Sigma$ DEHP                        | $\Sigma$ AA phthalates | $\Sigma$ DEHP                     | $\Sigma$ AA phthalates        |
| Model 1 <sup>b</sup> | 4.8 (-8.0, 19.3)                     | 5.0 (-7.3, 18.9)       | 33.2 (6.6, 66.4) <sup>c</sup>     | 26.8 (2.2, 57.4) <sup>c</sup> |
| Model 2 <sup>d</sup> | 4.8 (-10.2, 22.2)                    | 5.0 (-9.9, 22.3)       | 34.3 (3.1, 74.9) <sup>c</sup>     | 27.4 (-2.4, 66.3)             |
| Model 3 <sup>e</sup> | 5.9 (-7.8, 21.5)                     | 6.0 (-7.2, 20.9)       | 36.0 (8.4, 70.7) <sup>c</sup>     | 28.1 (2.5, 60.1) <sup>c</sup> |

Abbreviations: AOR, adjusted odds ratio; CI, confidence interval.

<sup>a</sup> Percent difference is for a doubling of phthalate biomarker concentration (ng/mL).

<sup>b</sup> Main model, adjusted for age (continuous), race/ethnicity (Black vs. White or Latina), and body mass index (BMI, continuous). N = 57 (fibroid size), N = 56 (uterine volume).

<sup>c</sup> P < 0.05.

<sup>d</sup> Participants with prior fibroid surgery are excluded. Adjusted for age, race/ethnicity, and BMI. N = 51 (fibroid size), N = 50 (uterine volume).

<sup>e</sup> Participants for whom urine was collected after surgery are excluded. Adjusted for age, race/ethnicity, and BMI. N = 51 (fibroid size), N = 50 (uterine volume).

## Figure Legends

Figure S1. Correlation Matrix of Specific Gravity-Adjusted Phthalate Biomarker Concentrations.

Color represents Spearman correlation coefficient.

Figure S2. Specific Gravity-Adjusted Phthalate Biomarker Concentrations by Race/Ethnicity.

Asterisk indicates  $p < 0.05$  from t test of natural log-transformed, specific gravity-adjusted concentration of phthalate biomarker by race/ethnicity.

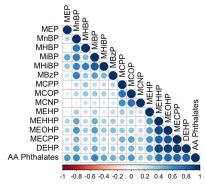

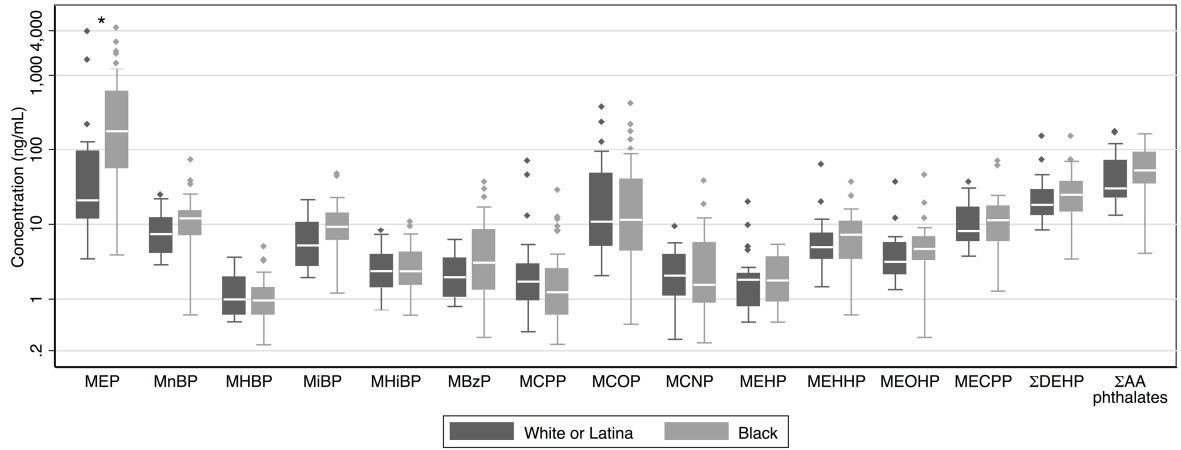

Supplement: NIHMS1507678-supplement-1.pdf [file NIHMS1507678-supplement-1.pdf]
